# Supplementary material
Source: HighWire-hosted journal article supplement (https://bmjopenquality.bmj.com/content/11/1/e001622)
Supplement: inline-supplementary-material-2 [file inline-supplementary-material-2.pdf]

## **Virtual Consultation Patient Survey Questions**

### **1) Have you had a remote consultation before?**

*a) If yes, tell us a little bit about your experience (Which way did you consult? Did you feel it was like a real consultation? What did you like/dislike about it?)*

*b) If no, would you be able to consult remotely?*

### **2) Which way would you prefer to consult?**

### **3) Do you prefer face to face consultations rather than tele-consultations?**

### **4) Anything you want to add that could make the remote consultation easier and better for our patients?**
